# Supplementary material
Source: PubMed Central journal article supplement (PMC3021064)
Supplement: 1015981108_pnas.201015981SI.pdf [file 1015981108_pnas.201015981SI.pdf]

# Supporting Information

Philippidou et al. 10.1073/pnas.1015981108

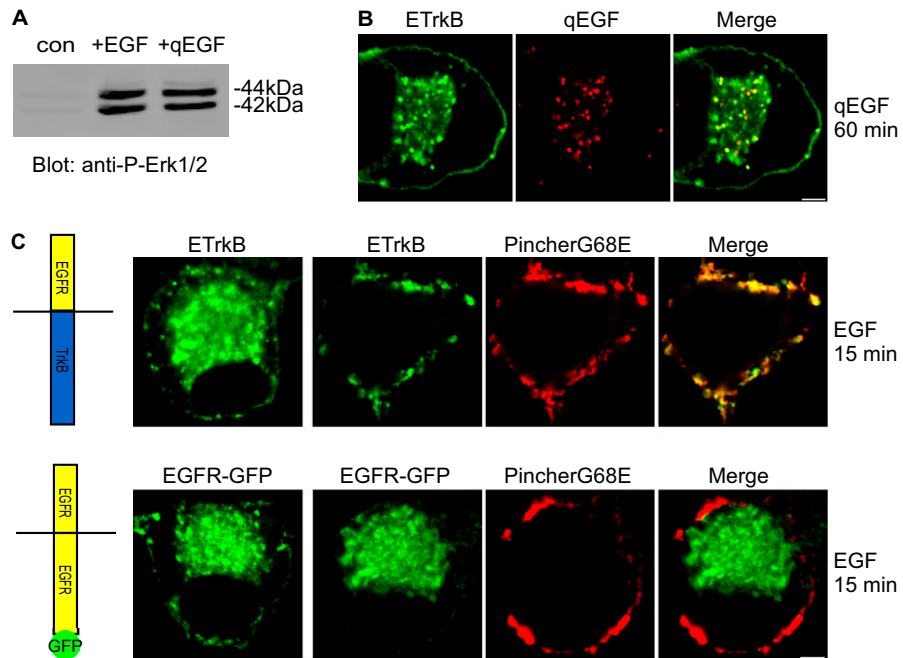

**Fig. S1.** Using the EGFR/TrkB receptor (ETrkB) chimera and EGF-Quantum dot 605 (qEGF) to monitor and manipulate Trk retrograde signaling. (A) Western blot analysis of PC12 cell extracts treated with 20 ng/mL EGF (Center) or 20 ng/mL qEGF (Right) or left untreated (Left). Cell lysates were probed with an anti-phospho-Erk1/2 antibody. (B) Mass cultures of superior cervical ganglia (SCG) neurons were infected with an adenovirus containing ETrkB, the chimeric EGF-binding TrkB receptor, and treated with qEGF for 60 min. Cells were fixed and stained with an antibody against the extracellular domain of EGFR. ETrkB (anti-EGFR, green) and qEGF (red) were visualized. (Scale bar, 2 μm.) (C) Mass cultures of SCG neurons were infected with an adenovirus containing either ETrkB (Upper) or EGFR-GFP (Lower) alone (Left) or together with PincherG68E (three Right panels), treated with EGF for 15 min, fixed and stained. ETrkB (anti-EGFR, green, Upper), EGFR (GFP, green, Lower), and PincherG68E (anti-Pincher, red) were visualized. (Scale bar, 2 μm.)
